# Supplementary material for: VEGF-Induced Expression of miR-17–92 Cluster in Endothelial Cells Is Mediated by ERK/ELK1 Activation and Regulates Angiogenesis
Source: PubMed Central journal article supplement — Circ Res. 2016 Jan 7;118(1):38–47. doi: 10.1161/CIRCRESAHA.115.307408 (PMC4703066; doi:10.1161/circresaha.115.307408), 2016-01-07
Supplement: res-118-38-s001.pdf [file res-118-38-s001.pdf]

## Circulation Research

---

**From:** Eichmann, Anne <anne.eichmann@yale.edu>  
**Sent:** Friday, October 09, 2015 11:09 AM  
**To:** circulation.research@circresearch.com  
**Cc:** Suarez, Yajaira  
**Subject:** Ms # CIRCRES/2015/307408DR1

Dear Editor,  
I hereby express my permission to be acknowledged in this paper.  
best regards,  
Anne

Anne Eichmann  
Ensign Professor  
Cardiology, Physiology  
Yale University School of Medicine  
New Haven CT

## Circulation Research

---

**From:** Zhou, Huanjiao <huanjiao.zhou@yale.edu>  
**Sent:** Friday, October 09, 2015 5:38 AM  
**To:** Suarez, Yajaira; circulation.research@circresearch.com  
**Subject:** Ms # CIRCRES/2015/307408DR1

Dear Yajaira,

Congrats! Look at the time, you work so hard almost till daybreak. Thank you so much for your acknowledgement in your great paper!

Dear editor,

I am more than happy to be acknowledged in Prof. Yajaira Suarez's Circ Research manuscript # CIRCRES/2015/307408DR1. Please see the email below. Thanks.

Best,

Huanjiao (Jenny) Zhou

On Oct 9, 2015, at 4:09 AM, Suarez, Yajaira <[yajaira.suarez@yale.edu](mailto:yajaira.suarez@yale.edu)> wrote:

Hi Jenny,

We acknowledge in our manuscript accepted yesterday in Circ Res for your advice in the fibrin bead gel assay.

Could you please forward an email to [circulation.research@circresearch.com](mailto:circulation.research@circresearch.com) regarding Ms # CIRCRES/2015/307408DR1 (in the subject line) to cite your permission to be acknowledged in the Circ Research manuscript?

Thanks you very much in advance,

Yajaira

## Circulation Research

---

**From:** Davis-Arrington, Gwendolyn <gwendolyn.davis@yale.edu>  
**Sent:** Friday, October 09, 2015 10:37 AM  
**To:** circulation.research@circresearch.com  
**Subject:** Ms# CIRCRES/2015/307408DR1

I give you permission to acknowledge me in the Cir Research manuscript.

Thanks  
Gwen

## Circulation Research

---

**From:** Nicole Calabro <nicole.calabro@yale.edu>  
**Sent:** Friday, October 09, 2015 6:18 AM  
**To:** circulation.research@circresearch.com  
**Subject:** Ms # CIRCRES/2015/307408DR1

Hi,

I give my permission to be acknowledged in Circ Research Ms # CIRCRES/2015/307408DR1.

Thank you very much,

Nicole Calabro
